# Placenta-Like Structure of the Aphid Endoparasitic Wasp *Aphidius ervi*: A Strategy of Optimal Resources Acquisition

Ahmed Sabri<sup>1\*</sup>, Thierry Hance<sup>2</sup>, Pascal D. Leroy<sup>3</sup>, Isabelle Frère<sup>2</sup>, Eric Haubruge<sup>3</sup>, Jacqueline Destain<sup>1</sup>, Philippe Compère<sup>4</sup>, Philippe Thonart<sup>1</sup>

**1** Centre Wallon de Biologie Industrielle, University of Liege, Liege, Belgium, **2** Earth and Life Institute, Biodiversity Research Center, University of Louvain-la-Neuve, Louvain-la-Neuve, Belgium, **3** Department of Functional and Evolutionary Entomology, University of Liege Gembloux Agro-Bio Tech, Gembloux, Belgium, **4** Laboratoire de Morphologie Ultrastructurale, University of Liege, Liège, Belgium

## Abstract

*Aphidius ervi* (Hymenoptera: Braconidae) is an entomophagous parasitoid known to be an effective parasitoid of several aphid species of economic importance. A reduction of its production cost during mass rearing for inundative release is needed to improve its use in biological control of pests. In these contexts, a careful analysis of its entire development phases within its host is needed. This paper shows that this parasitoid has some characteristics in its embryological development rather complex and different from most other reported insects, which can be phylogenetically very close. First, its yolkless egg allows a high fecundity of the female but force them to hatch from the egg shell rapidly to the host hemocoel. An early cellularisation allowing a rapid differentiation of a serosa membrane seems to confirm this hypothesis. The serosa wraps the developing embryo until the first instar larva stage and invades the host tissues by microvilli projections and form a placenta like structure able to divert host resources and allowing nutrition and respiration of embryo. Such interspecific invasion, at the cellular level, recalls mammal's trophoblasts that anchors maternal uterine wall and underlines the high adaptation of *A. ervi* to develop in the host body.

**Citation:** Sabri A, Hance T, Leroy PD, Frère I, Haubruge E, et al. (2011) Placenta-Like Structure of the Aphid Endoparasitic Wasp *Aphidius ervi*: A Strategy of Optimal Resources Acquisition. PLoS ONE 6(4): e18847. doi:10.1371/journal.pone.0018847

**Editor:** Guy Smagghe, Ghent Universit, Belgium

**Received:** November 4, 2010; **Accepted:** March 21, 2011; **Published:** April 19, 2011

**Copyright:** © 2011 Sabri et al. This is an open-access article distributed under the terms of the Creative Commons Attribution License, which permits unrestricted use, distribution, and reproduction in any medium, provided the original author and source are credited.

**Funding:** This work was supported by "la Région Wallonne de Belgique" convention Waleo2 n°061/6288. The funders had no role in study design, data collection and analysis, decision to publish, or preparation of the manuscript.

**Competing Interests:** The authors have declared that no competing interests exist.

\* E-mail: a.sabri@ulg.ac.be

## Introduction

Parasitoids are entomophagous insects that are playing an important role in natural ecosystems and in the control of crop pests. However, until now, despite the advantages they offer in biological control, their use remains largely limited compared with that of chemical pesticides. This is probably due to the difficulty to their mass production, which still relies on the classical approach and requires complex infrastructures to produce hosts (insects and plants) [1,2].

Parasitoid usage in biological control should be greatly enhanced if a wide variety of these species could be mass produced by *in vitro* culture [3]. This should promote inundative strategies and extend biological control application to gradually replace chemical pesticides [2,3,4,5]. However, development of suitable conditions and artificial diets requires an overall and detailed understanding of their developmental processes and interactions with the host [6].

*Aphidius ervi* (Haliday) (Hymenoptera, Braconidae) is an efficient parasitoid of several economically important aphid species and is found almost everywhere in the world [7,8]. In last decade, several laboratories have explored the possibilities of its mass production and achieved a limited success [4,9,10,11].

Pennacchio and Strand (2006) had underlined some aspect of its very complex embryological development, which involves pro-

found interactions with the host [12]. *A. ervi* presents some embryological features rather different from free living insects, which can be phylogenetically very close [13]. First of all, its egg is hydroptic, yolkless and contains very few energetic reserves, except some lipid globules [13,14]. In consequence, the early egg development depends on how fast the embryo is able to uptake resources from its host without being killed by the immune systems. Particular adaptation should render that possible. For instance, a kind of venom is injected by the female during oviposition [15,16]. It acts directly on the germarium of the host and induces an inhibition of ovarioles development and stops the current development of aphid first larvae already present inside the aphid host. As pointed out previously [17,18], the parasitoid larvae need also to regulate the host development and consumes gently his body to avoid killing it too rapidly. For instance, because of yolkless eggs, embryos have developed many fascinating strategies to redirect nutrients from the host body in their favour [11,15,19,20].

In free living insects, embryo develops by consuming the maternally derived nutrients accumulated in vitellins [21,22]. These reserves of nutrients, currently named yolk, are deposited in oocytes during the vitellogenesis. The amount of yolk in eggs is generally related to the development patterns and its consumption gives embryo all needed nutrients to achieve its development. In

Hymenoptera order, which includes many parasitic wasps, eggs can be large and yolky as in free living species and ectoparasitic ones or small and yolk poor as in the endoparasitic species [13,23]. This variability of eggs contents requires inevitably structural and functional adaptations, especially in extraembryonic membranes that are implicated in many important embryonic processes such as yolk processing and consumption [24,25].

Among embryo extraembryonic membranes, serosa represents an important structure that develops from polar body or from embryonic cells at the start of embryogenesis [26]. For many authors, serosa has mainly contributed to the spectacular radiation of insects in terrestrial habitats [27]. It plays several roles such as blastokinesis, protection from desiccation and infections. In some species, serosa is involved in cuticle production and can supplant the protection provided by the chorion. It is also reported that it is implicated in yolk catabolism and active transport of resulting metabolic waste (for review see [25]).

Our aims were to decipher the key developmental phases of the endoparasitic wasp *A. ervi* throughout the embryological and early larval stages. We hypothesize that the adult female of this parasitic wasp developed a cuckoo-like strategy killing the aphid offspring inside its host and recreating a placenta like structure able to divert host resources from its own ovogenesis and allowing nutrition and respiration of parasitoid larvae.

## Results

### Early cellularisation and hatching

*A. ervi* egg reach  $100 \pm 15 \mu\text{m}$  long with a very thin chorion (Figure 1A). It contains a weak amount of yolk compared to eggs of other free living Hymenoptera [13]. Following oviposition, the syncytial phase, characteristic of insect development is almost non-existent as already mentioned by Grbic (2000) [13]. Blastomers separated by cell membranes are detected through the chorion very soon after the first nuclear cleavage (Figure 1B). Then, two types of cells that differ in size become visible through the chorion.

The largest ones ( $20 \pm 5 \mu\text{m}$  in diameter) are often just under the chorion and will produce the serosa membrane. The smallest cells (about  $8 \pm 3 \mu\text{m}$  in diameter) constitute the primordium.

Early cellularisation followed by the folding processes of serosa cells (Figure 1C) occur within the chorion and causes a slight swelling of the egg. The chorion rupture occurs after 24 h (Figure 1D) and may be considered the true egg hatching. It produces a morula-like structure of about  $150 \pm 40 \mu\text{m}$  of diameter bathing in the host haemocoel (Figure 1E) and composed of a cluster of embryonic cells surrounded by a monolayer of 16 cells forming the serosa membrane. The primordium lies in that structure surrounded by a blastocoel. It is thus well separated from the host hemocoel.

### Morula-like structure anchorage in the host fat body

Following its liberation in the host hemocoel, the morula-like structure has still about  $150 \mu\text{m}$  diameter and is clearly anchored in the host tissue, mainly in fat body (Figure 2). During the following 24 h, its size increases progressively to reach about  $200 \mu\text{m}$  of diameter. Cells forming the serosa undergo limited divisions and give about 32 cells organized in a continuous monolayer of cells around the blastocoels, which bathes the developing embryo. Serosa cells appear completely separated from embryo that floats in the blastocoels.

### Embryogenesis of *A. ervi* and second hatching

During embryogenesis, serosa membrane shelters the embryo which develops in the blastocoels. Just after hatching, the primordium consists of a cluster of cells and undergoes a germband elongation (Figures 3A, 3B). Seventy hours after oviposition, still within the blastocoels, the embryo acquires a coiled shape. A process of condensation and segmentation is then initiated in an anterior-to-posterior sequence (Figures 3C and 3D where serosa was removed). One hundred h after parasitization, metameres is clearly apparent through the serosa and the embryo is gradually transformed in a first instar larva (Figure 3E).

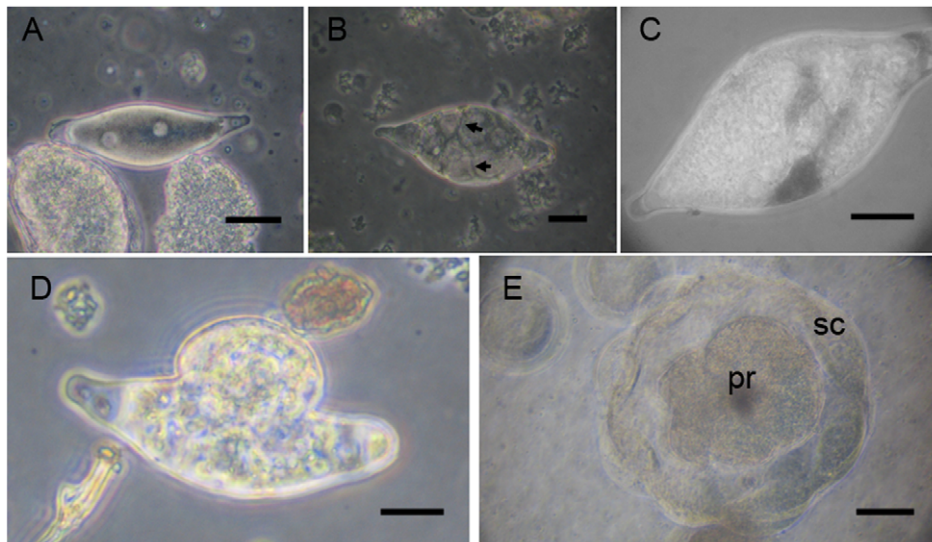

**Figure 1. Egg development from oviposition to first hatching and release of a morula-like structure.** **A.** Egg of *A. ervi* in the first hours after oviposition. **B.** Cellularisation occurs after limited syncytial cleavages, cell membranes are visible through the chorion (arrows in B). **C.** Folding processes of serosa cells beneath the egg chorion. **D.** Chorion rupture and embryo emergence from the chorion in the host hemocoel within the 24 h after oviposition (first hatching). **E.** Morula-like structure, about 24 h after hatching in the blastocoels. It is formed by the primordium (**pr**) surrounded by a monolayer of large cells, serosa cells (**sc**) forming the serosa membrane (Scale bars  $25 \mu\text{m}$  for all panels). Abbreviations: pr, primordium; sc, serosa cells.

doi:10.1371/journal.pone.0018847.g001

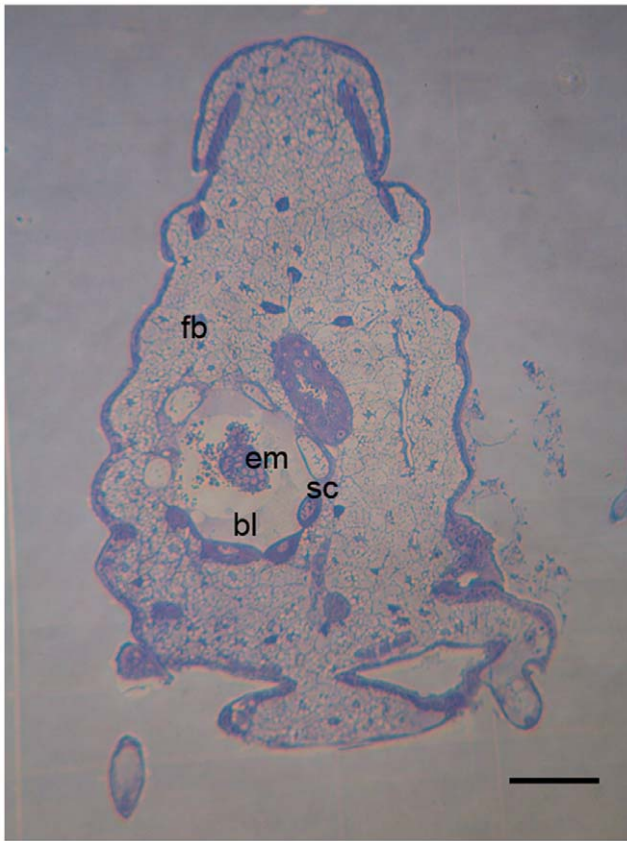

**Figure 2. Semithin section of *A. pisum* parasitized by *A. ervi* embryo after about 48 hours of development.** Parasitoid embryo begins its development surrounded by a serosa membrane (Scale bar 100  $\mu$ m). Abbreviations: fb, fat body; em, embryo; bl, blastocoel; sc, serosa cells.  
doi:10.1371/journal.pone.0018847.g002

Until the 5<sup>th</sup> day of development, the embryo has no direct interaction with the aphid tissues and all nutrients exchanges are done through the blastocoels and through the serosa membrane. After about 120 h, the 1<sup>st</sup> instar larva hatches in the aphid hemocoel by ripping off the serosa (Figure 3F).

### Serosa membrane ultrastructure

Light and transmission electron microscopy (TEM) analysis showed that the serosa membrane is composed of two kinds of large cells showing differences in their cytoplasm density (Figure 4A).

Cells with dense cytoplasm show a very high density of free ribosomes and contain many rough endoplasmic reticulum and mitochondria (Figure 4B). Their nuclei are irregular at the side facing the apical membrane of cells (Figure 4C). Cells with less dense cytoplasm have large nuclei and their cytoplasm contains many mitochondria and small vesicles (Figure 4D).

For both kinds of cell, we found that plasma membrane has domains with profound morphological differences (Figure 5). Their basal side (facing the embryo) appears regular and uninterrupted. However, magnifications reveal the formation of several vesicles, which are released in the blastocoel corresponding probably to an exocytose of nutrients (Figure 5B). The apical side (host body oriented side) is crowded with microvilli, which extend into the host fat body and allow the anchorage of the serosa membrane in the parasitized aphid tissue (Figure 5C).

Serosa cells are organized in a continuous monolayer and provide an interface between host tissues and the blastocoel bathing the embryo. Two types of junction are observed between serosa cells, gap junctions (gj) are mainly observed between adjacent cells with dense cytoplasm (Figure 6A). The same junctions are also observed between cells with dense cytoplasm and cells with less dense cytoplasm (Figure 6B). The second types of junctions are tight junctions and seal spaces between adjacent less dense serosa cells in a narrow band beneath their basal surface (facing the blastocoels) (Figure 6C).

High magnification confirmed that serosa is anchored in the host tissues. Figure 7A reveals that some cells of the serosa grow around the host trachea providing oxygen to the developing embryo. Many other serosa cells show microvilli projections, at their apical side, extended deeply into the host tissues (frequently up to 20  $\mu$ m) (Figure 7B). This lead to think that they are acting like a digestive epithelium.

### Serosa membrane dissociation and teratocytes release

Cells of serosa membrane dissociate into free teratocytes as soon as the parasitoid larva egresses in the host haemocoel (Figures 8A, 8B). Five days after oviposition, about  $30 \pm 5$  free teratocytes were observed in the host. After their release, their number remains almost the same up to 7 days after parasitization and then decreases drastically to about  $18 \pm 5$  and  $2 \pm 1$  teratocytes respectively on days 8<sup>th</sup> and 9<sup>th</sup>. Their size at their release is about  $40 \pm 10$   $\mu$ m diameter and increase during the two following days up to approximately  $200 \pm 50$   $\mu$ m. The cytoplasm fraction of many of them became progressively crowded with vesicles, which appear to be similar to lipid droplets of the host fat body cells (Figure 8C).

### Discussion

It is often reported that nutritional needs of parasitoids are not different from those of other free-living insect species. However, nutritional investigations focused principally on dietary and nutritional requirements have achieved a limited success yet, especially for the endoparasitic ones [28]. For the parasitoid *A. ervi*, it is increasingly clear that this failure is not only due to inappropriate culture media but is also due to other factors such as certain particularities of its embryological development.

Parasitoid wasps have evolved a wide spectrum of developmental strategies in response to parasitic life [12]. *A. ervi* seems in agreement with this and shows a rather complex embryological development that is different from many other species which can be phylogenetically very close. Indeed, nearly all insect embryos undergo a syncytial phase of development during the initial cleavages of embryogenesis and consists of nuclear mitotic divisions without cell membranes formation [29,30]. In the case of *A. ervi*, early embryogenesis seems to lack this universal phase and cell membranes are distinguishable through the chorion simultaneously with the first divisions. Grbic (1998) has demonstrated using intracellular tracer dye injections that this phase, in *A. ervi*, is so short that only the first cleavage occurs in a syncytium [31]. The same author suggests that early cellularization is not an exception in parasitic wasps and can be related to the mode of nutrition and the amount of yolk in their eggs. For example, the endoparasitic wasp *Copidosoma floridanum* (Ashmead) (Hymenoptera, Encyrtidae) has a small and yolk-poor egg and undergoes an early cellularisation similar to that for *A. ervi*. In contrast, the ectoparasitic wasp *Bracon hebetor*, despite that it is phylogenetically most close to *A. ervi*, its large and yolky egg undergoes long germband development including 12 syncytial nuclear divisions before cellularization [13,32].



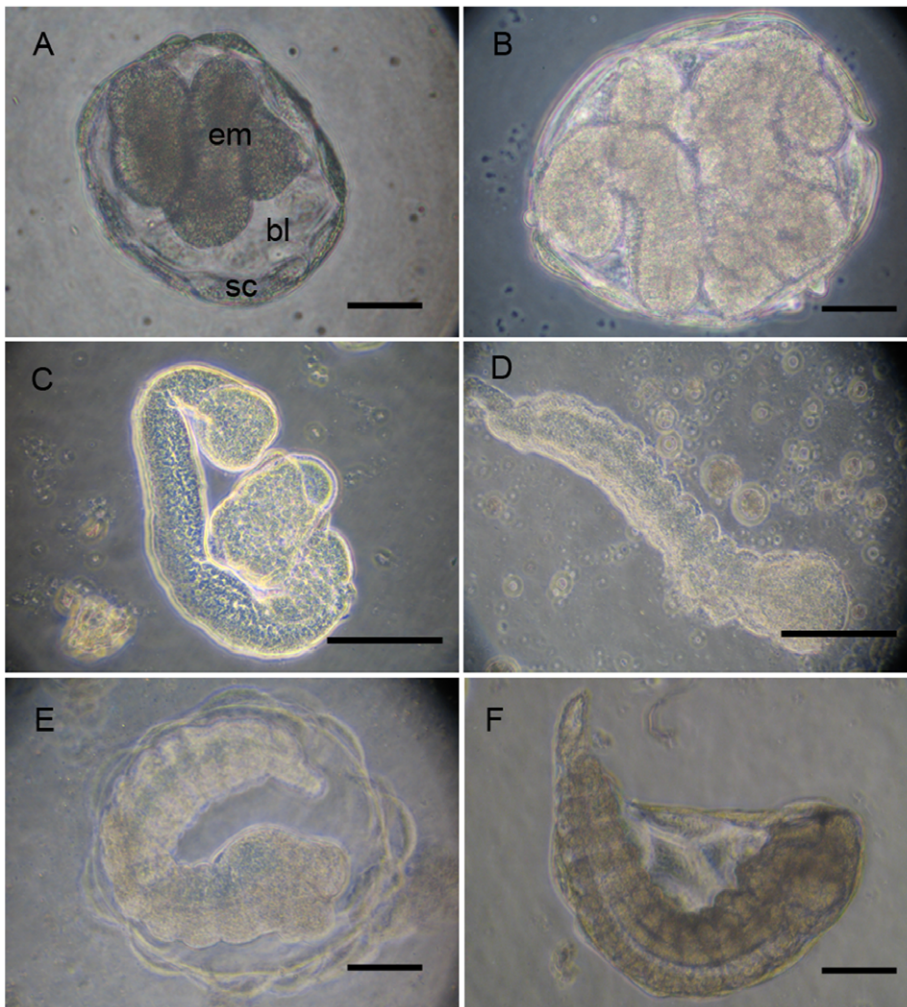

**Figure 3. *A. ervi* embryo development from the first to the second hatching.** Until the 5<sup>th</sup> day of development, all embryonic and 1st instar larva stages occur within the blastocoels (**bl**) delimited by the serosa membrane (**sc**). **A,B.** The primordium undergoes its growth by extension of the posterior part and the embryo (**em**) acquires a coiled shape, about 70 h after oviposition. **C,D.** The elongation phase is followed by a condensation and segmentation phases as illustrated in **C** and **D**, where the serosa was removed. **E,F.** Embryo reaches its full development after about 120 h and a 1<sup>st</sup> instar larva hatches in the aphid hemocoel by ripping off the serosa (second hatching). (Scale bars 100  $\mu$ m for all panels). Abbreviations: bl, blastocoel; em, embryo; sc, serosa cells.  
doi:10.1371/journal.pone.0018847.g003

The lack of syncytial phase and early cellularisation in *A. ervi* egg are correlated with a rapid differentiation of large cells that give the serosa membrane upon hatching. If one considers these observations and the low content of yolk in the egg, it is tempting to say that the embryo seems in a “time trial” to leave the eggshell as soon as possible to uptake its nutrients from host hemocoel with an appropriate structure without any barriers. Furthermore, this hypothesis is supported by premature emergence of the morula-like structure from the egg chorion, within 24 h.

For other parasitoid Hymenoptera, close to *A. ervi*, hatching from the chorion occurs much later and the released larvae are at advanced stages of their development. This is the case for *Cardiochiles nigriceps* (Viereck) (Hymenoptera: Braconidae) where egg volume increases and stretches the chorion several hundred-folds [33,34]. *Microplitis croceipes* (Cresson) (Hymenoptera: Braconidae) hatches from the chorion about 40 h after oviposition with the aid of abdominal contractions of first instar larva [35]. *Cotesia congregata* (Say) (Hymenoptera: Braconidae) and *Meteorus pulchricornis* (Wesmael) (Hymenoptera: Braconidae) emerge from the

chorion 48 to 72 h after oviposition [36,37]. Therefore, for all cited cases, the chorion remains around the embryo until first instar larvae stages and its rupture release larvae and free teratocytes in the host body. For *A. ervi*, chorion rupture happens too early, but the released primordium remains readily wrapped in the serosa membrane until the 5<sup>th</sup> day of its development.

An overview of the literature shows that extraembryonic membranes are regarded as an important aspect of insect embryogenesis and represent one of insect’s evolutionary innovations that contribute to their high adaptability to environmental conditions and their ability to conquer various ecological niches [25,27,38,39]. Most insects develop two extraembryonic epithelia from an amnioserosal fold, called amnion and serosa. The serosa detaches from the amnion and encloses the embryo amnion and yolk [25,38,39,40,41,42,43].

For endoparasitic species of Hymenoptera, the serosa has been studied in relatively few species and most available information concerns its dissociation after hatching to teratocytes [34,36,44,45,46].

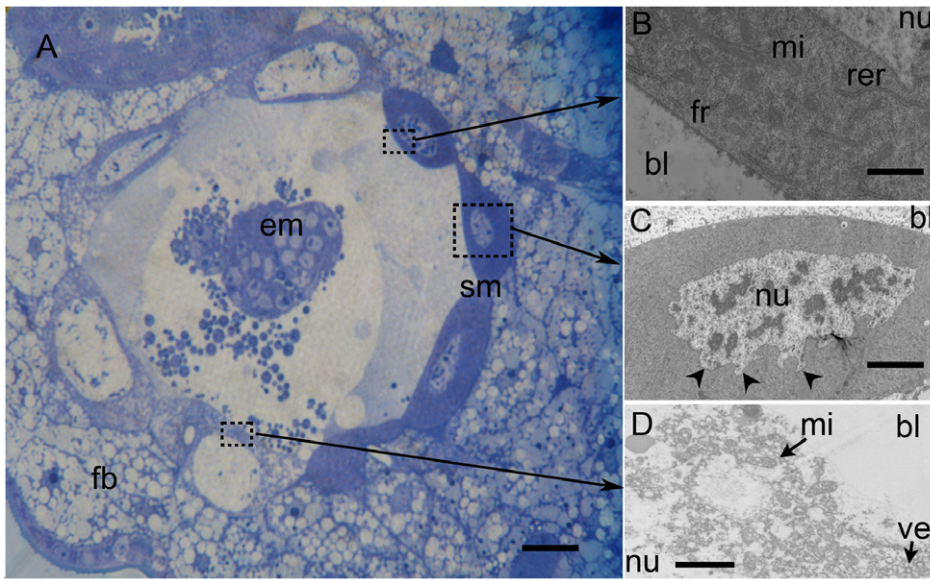

**Figure 4. Semithin and thin sections of *A. ervi* embryo and its serosa membrane.** **A.** 48 h old embryo (**em**) in *A. pisum*, the serosa membrane (**sm**) is anchored in the fat body (**fb**) of the host and is formed by two types of cells with different cytoplasm density. **B.** TEM micrograph revealing that cells with dense cytoplasm are very rich in free ribosomes (**fr**) and contain many mitochondria (**mi**) and rough endoplasmic reticulum (**rer**). **C.** The nuclear membranes of dense cells are irregular on the side facing aphid tissue (arrowheads in **C**). **D.** The second type of cells has less dense cytoplasm with relatively large nucleus (**nu**) (visible in panel **A**). Their cytoplasm contains many mitochondria and small vesicles (**ve**). Scale bars = 25  $\mu\text{m}$  in **A**, 1  $\mu\text{m}$  in **B**, 10  $\mu\text{m}$  in **C** and 2  $\mu\text{m}$  in **D**. Abbreviations: em, embryo; fb, fat body; sm, serosa membrane; bl, blastocoele; fr, free ribosomes; mi, mitochondria; nu, nucleus; rer, endoplasmic reticulum; ve, vesicles. doi:10.1371/journal.pone.0018847.g004

So, even if *A. ervi* represents one of the most studied endoparasitic hymenoptera and although its embryonic development has received a great interest in the last decades there is no information about the serosa. Yet the latter seems to be devoted

to play a key role in the control of all embryo interactions with the host since until the emergence of a first instar larva, it represents an interrupted interface between embryo and the host body. A nutritional role of the serosa has been already reported

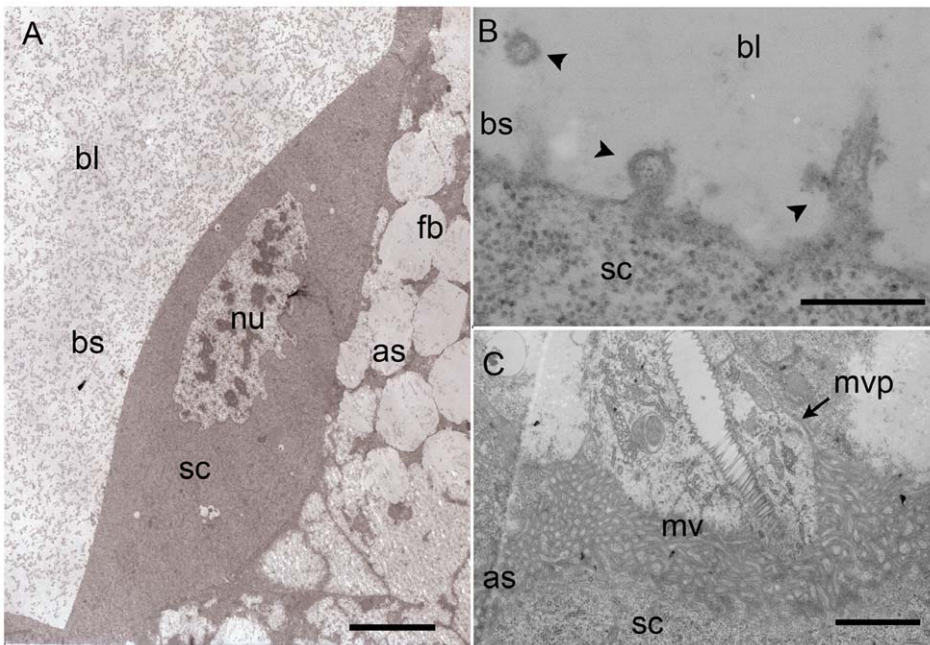

**Figure 5. TEM micrographs of the serosa cells 48 h after oviposition.** **A.** Serosa cells (**sc**) are highly polarized with separate apical and basal membrane. **B.** The basal side (**bs**), facing the blastocoele (**bl**) shows several exocytosis vesicles (**ve**) (arrowheads in **B**). **C.** The apical side (**as**), facing the parasitized aphid tissue, shows microvilli (**mv**) and microvilli projections (**mvp**) in the aphid tissue. Scale bars = 10  $\mu\text{m}$  in **A**, 1  $\mu\text{m}$  in **B** and 3  $\mu\text{m}$  in **C**. Abbreviations: as, apical side; bl, blastocoele; bs, basal side; fb, fat body; mvp, microvilli projections; mv, microvilli; nu, nucleus; sc, serosa cells. doi:10.1371/journal.pone.0018847.g005



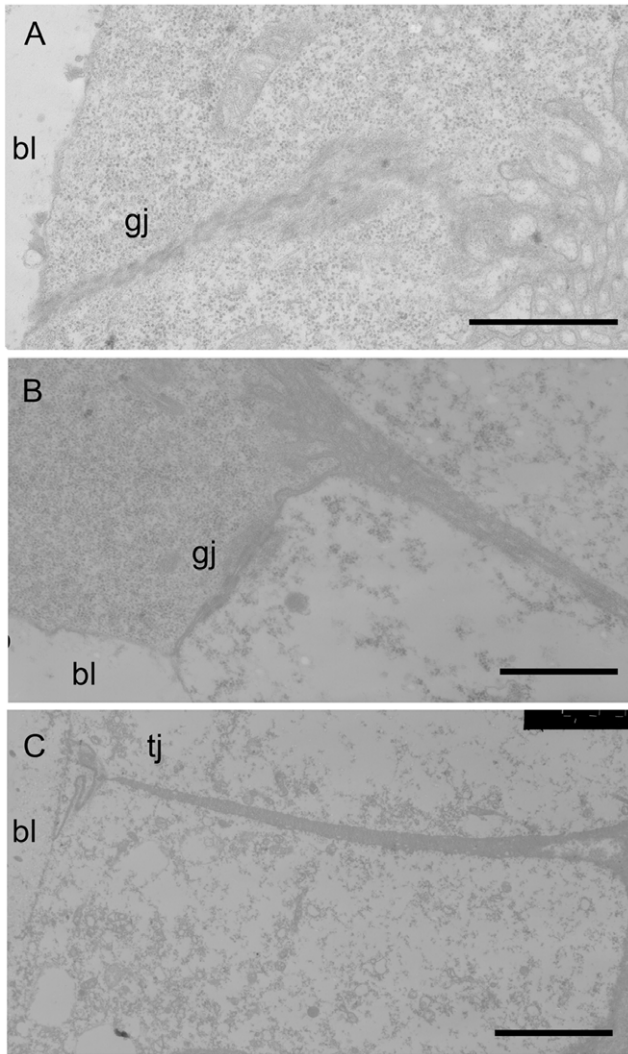

**Figure 6. Junctions observed between serosa cells after 48 h of parasitoid development. A,B.** Gap junctions (**gj**) are mainly present between cells with dense cytoplasm and between dense cells and cells with less dense cytoplasm. **C.** Tight junctions (**tj**) are observed between cells with less dense cytoplasm. **bl**, blastocoel. Scale bars = 5 μm for all panels. Abbreviations: bl, blastocoel; gj, gap junctions; tj, tight junctions.

doi:10.1371/journal.pone.0018847.g006

by Pennacchio et al. 1994 for *Cardiochiles nigriceps* which, as for *A. ervi*, the embryo remain wrapped by different types of cells forming a continuous serosa [34]. Exocytosis-vesicles at the basal side of cells as well as their abundant mitochondria, free ribosomes and rough endoplasmic reticulum reflect a high metabolic activity and suggest an active role in nutrient processing before their release into the blastocoel. Such characteristic seems shared by serosa cells of many other reported endoparasitic hymenoptera species [36,45,46]. Moreover, it has been demonstrated that for *Microplitis croceipes*, the major contribution of the female to its progeny development consists in furnishing a great number of ribosomes and mitochondria, which allow an active protein synthesis during embryogenesis. All proteinic requirements are taken up from the host hemolymph as free amino acids [14,47,48,49]. On the other hand, the serosa of most reported species seems to contain different types of cells with deep cytological differences suggesting that serosa role is very

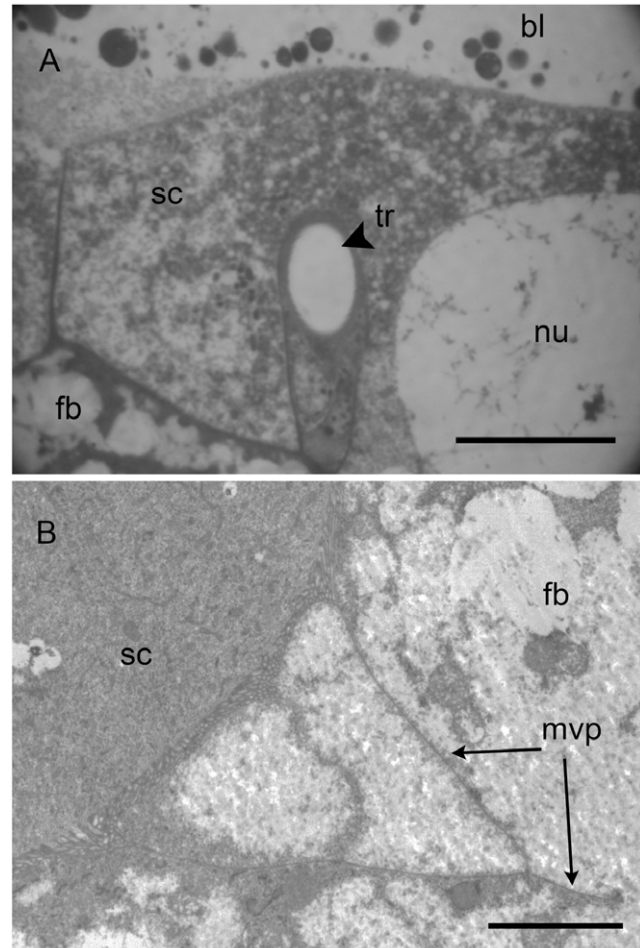

**Figure 7. The serosa is anchored in the fat body of parasitized aphid. A.** Some serosa cells (**sc**) grow around the host trachea (**tr**) (arrowhead in **A**). **B.** The apical side of some other serosa cells forms microvilli projections (**mvp**) that extend deeply into the host fat body (**fb**). Scale bars = 10 μm in **A** and 5 μm in **B**. Abbreviations: bl, blastocoel; fb, fat body; mvp, microvilli projections; nu, nucleus; tr, trachea; sc, serosa cells.

doi:10.1371/journal.pone.0018847.g007

complex and is certainly not limited neither to a nutritional nor a protective roles.

Serosa polarity has been described by Grimaldi et al. (2006) for the tobacco budworm parasitoid *Toxoneuron nigriceps* [45]. In this case, the serosa membrane is formed by a layer of cells showing microvilli both in the basal and apical side. At the apical side, microvilli are organized in a brush border and covered by a thick amorphous felt. Conversely, the serosa of *A. ervi* appears deeply anchored in the aphid body without a clear margin or any protective structure. The serosa implantation in the host body is confirmed by cellular expansion around host trachea and microvilli projections in neighbors' tissues. To our knowledge, such invasion of host tissue by the serosa cells represents a particularity never reported previously for other parasitoid and recalls mammal's trophoblasts that allow embryo implantation to maternal uterus.

On the other hand, back on the topic of the *in vitro* culture of this valuable insect, it is important to note that in animal cell culture most cells need a surface or substrate to adhere to so that they are able to develop [50,51,52]. This leads, therefore, to believe that *A.*

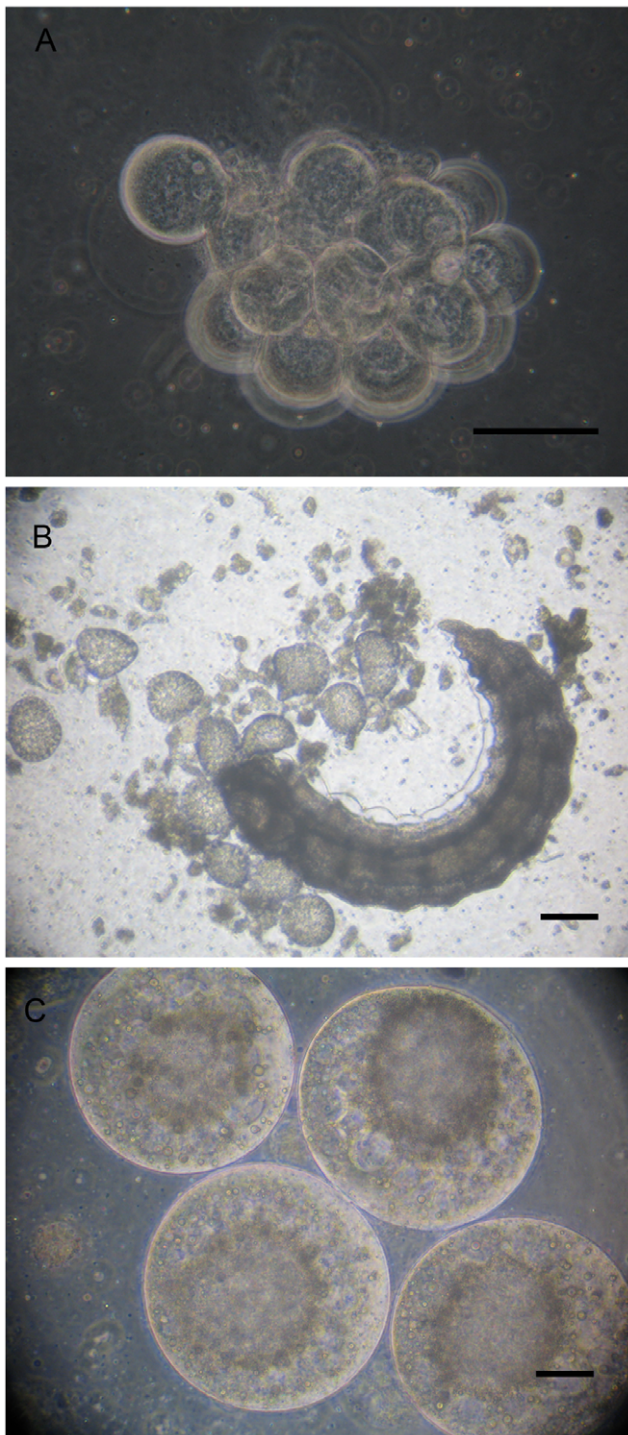

**Figure 8. Serosa dissociation into teratocytes.** A, B. Serosa cells dissociate to free teratocytes in the aphid hemocoel after the larva hatching. C. Teratocytes sizes reach about  $200 \pm 50 \mu\text{m}$  (about 5 fold their size at the hatching). Scale bars =  $50 \mu\text{m}$ . doi:10.1371/journal.pone.0018847.g008

*ervi* serosa anchorage in host tissues could be among the causes of the limited success of *in vitro* culture and represents a requirement that needs also to be taken into account to improve our chances to produce it.

In conclusion, *Aphidius ervi* have developed an original way of development to optimize host resources exploitation. The eggs'

weak content of yolk allows female to reduce its investment in the vitellogenesis and to have a high fecundity [7,14,23]. Moreover, the host embryos of the aphids already in development are killed by the mother venom injection allowing a reallocation of all host resources to the parasitoid [15,16,53]. This recalls the cuckoo strategy wherein the female reduces its investment in its eggs and progeny making the host carry the burden of nurturing the offsprings. The lack of yolk in the egg is overcome by a very rapid hatching of the embryo at its earliest stage of development as a cluster of primordial cells wrapped in the serosa membrane. The latter membrane clearly acts like a mammal's placenta pumping the resources and oxygen from host tissue and in view of our observations it is tempting to say that among all the fascinating strategies adopted by *A. ervi*; those concerning the serosa deserve more than ever a special attention since they clearly make it on the "front line" of the host body conquest.

## Materials and Methods

### Rearing conditions

The parasitoid *A. ervi* was reared on *A. pisum*, maintained at least one week on old seedlings of *Vicia faba* (broad bean). Aphid and parasitoid cultures were kept in separate rearing chambers under  $20^\circ\text{C}$ , 75% RH and 16 h L: 8 h D photoperiod. *A. pisum* cultures were started in 1999, with insects collected by the Department of Functional and Evolutionary Entomology from Lucerne plants, in Belgium. *A. ervi* was provided by Viridaxis SA (Belgium).

### Host parasitization and dissection

Synchronised larvae (4 day old) of the host aphid *Acyrtosiphon pisum* were produced by leaving pea aphid adults to reproduce on broad bean plants for 8–10 h. The adults were then removed and the progeny produced over this time interval was maintained on the same plants under  $20^\circ\text{C}$  and 16 h L: 8 h D photoperiod. Four days old aphids were parasitized by *A. ervi* females in a petri dish ( $\text{O} \times 10 \text{ cm}$ ). After parasitization, aphids were placed back to broad bean plants and kept under the same environmental conditions until dissection. To examine the parasitoid development, at different time intervals after parasitoid oviposition, parasitized aphids were anaesthetised with  $\text{CO}_2$  then carefully dissected in a petri dish in  $100 \mu\text{l}$  of Shield and Sang medium (Sigma). A stereo microscope Wild M3B was used for dissections and selected samples were immediately transferred to an inverted microscope Olympus CK40 to take photographs. After parasitization, every 24 h, 40 to 50 parasitized aphids were processed.

### Histological analyses

Semithin and thin sections were performed. Parasitized aphids were fixed by direct immersion for 3 h at room temperature in a 2.5% glutaraldehyde solution buffered with 0.2 M Na-cacodylate at pH 7.4. The osmolarity was adjusted to 850 mOsm by addition of sucrose (5%). All samples were post-fixed in glutaraldehyde for 2 h at  $4^\circ\text{C}$  in buffered 1% OsO<sub>4</sub>, rinsed in distilled water, dehydrated in an ethanol-propylene oxide series, and embedded in epoxide (Glycidether 100, Serva). Flat silicone rubber moulds were used to facilitate orientation before sectioning. Aphids were cut into several semithin sections ( $1 \mu\text{m}$  thick) using glass knives (Ultramicrotome LKB or Reichert-Jung Ultracut E). Sections were then stained with toluidine blue for light microscopy in 1% toluidine blue at pH 9.0 before observation under an Olympus microscope. Selected samples were cut into ultrathin sections for transmission electron microscopy with a diamond knife and contrasted with uranyl acetate and lead citrate before examination with a JEOL TEM (JEM 100-SX) at 80 kV accelerating voltage.

## Acknowledgments

We thank Pels Christophe, Capella Quentin, and Nicole Decloux for their technical support. We also thank Jean-Michel Requile for careful reading of the manuscript. The manuscript was greatly improved by comments of anonymous two reviewers and the academic editor.

## References

- Grenier S, Greany P, Cohen A (1994) Potential for mass release of insect parasitoids and predators through development of artificial culture techniques. In: Rosen D, Bennett F, Capinera J, eds. Pest management in the subtropics: biological control, a Florida perspective: Intercept, Andover. pp 181–205.
- Vinson S (1994) Parasitoid *in vitro* rearing: successes and challenges. Nairobi/Kenya: ICIPE Science Press. pp 49–108.
- Greany P, Vinson S, Lewis W (1984) Insect parasitoid: finding new opportunities for biological control. *BioScience* 34: 690–695.
- Greany P (1986) *In vitro* culture of hymenopterous larval endoparasitoids. *J Insect Physiol* 32: 413–409–411, 419.
- Vinson S (1988) Physiological studies of parasitoids reveal new approaches to the biological control of insect pests. *Anim Plant Sci* 1: 25–32.
- Consoli F, Parra J (1999) Development of an artificial host egg for *in vitro* egg laying of *Trichogramma galloi* and *T. pretiosum* using plastic membranes. *Ent Exp App* 91: 327–336.
- Stilmant D, Bellinghen CV, Hance T, Boivin G (2008) Host specialization in habitat specialists and generalists. *Oecologia* 156: 905–912.
- González D, White W, Hall J, Dickson R (1978) Geographical distribution of *Aphididae* (Hymenoptera) imported to California for biological control of *Acyrtosiphon kondoi* and *Acyrtosiphon pisum* (Hom.: Aphididae). *BioControl* 23: 239–248.
- Ferkovich S, Ramos J, Rojas M, Oberlander H, Carpenter J, et al. (1999) Rearing of ectoparasitoid *Diapetimorpha introita* on an artificial diet: supplementation with insect cell line-derived factors. *BioControl* 44: 29–45.
- Gelman D, Carpenter J, Greany P (2000) Ecdysteroid levels/profiles of the parasitoid wasp, *Diapetimorpha introita*, reared on its host, *Spodoptera frugiperda* and on an artificial diet. *J Insect Physiol* 46: 457–465.
- Giordana B, Milani A, Grimaldi A, Farneti R, Casartelli M, et al. (2003) Absorption of sugars and amino acids by the epidermis of *Aphidius ervi* larvae. *J Insect Physiol* 49: 1115–1124.
- Pennacchio F, Strand M (2006) Evolution of developmental strategies in parasitic hymenoptera. *Annual Review of Entomology* 51: 233–258.
- Grbic M (2000) “Alien” wasps and evolution of development. *BioEssays* 22: 920–932.
- LeRalec A (1995) Egg contents in relation to host-feeding in some parasitic hymenoptera *BioControl* 40: 87–93.
- Beckage N, Gelman D (2004) Wasp parasitoid disruption of host development: implications for new biologically based strategies for insect control. *Ann Rev Ent* 49: 299–330.
- Digilio M, Isidoro N, Tremblay E, Pennacchio F (2000) Host castration by *Aphidius ervi* venom proteins. *J Insect Physiol* 46: 1041–1050.
- Vinson S (1981) Habitat location. In: Nordlund D, Jones R, Lewis W, eds. *Semiochemicals Their Role in Pest Control*. New York: John Wiley & Sons. pp 51–77.
- Vinson S (1984) How parasitoids locate their hosts: A case of insect espionage. In: Lewis T, ed. *Insect Communication*. London: Academic Press. pp 325–348.
- Falabella P, Tremblay E, Pennacchio F (2000) Host regulation by the aphid parasitoid *Aphidius ervi*: the role of teratocytes *Ent Exp App* 97: 1–9.
- Rahbé Y, Digilio M, Febvay G, Guillaud J, Fanti P, et al. (2002) Metabolic and symbiotic interactions in amino acid pools of the pea aphid, *Acyrtosiphon pisum*, parasitized by the braconid *Aphidius ervi*. *J Insect Physiol* 48: 507–516.
- Giorgi F, Bradley J, Nordin J (1999) Differential vitellin polypeptide processing in insect embryos. *Micron* 30: 579–596.
- Nordin J, Beaudoin E, Liu X (1990) Proteolytic processing of *Blattella germanica* vitellin during early embryo development. *Arch Insect Biochem Physiol* 15: 119–135.
- Jervis M, Eilers J, Harvey J (2008) Resource Acquisition, Allocation, and Utilization in Parasitoid Reproductive Strategies. *Annual Review of Entomology* 53: 361–385.
- Cecchetti A, Falleni A, Gremigni V, Locci M, Masetti M, et al. (2001) Yolk utilization in stick insects entails the release of vitellin polypeptides into the perivitelline fluid. *Eur J Cell Biol* 80: 458–465.
- Panfilio K (2008) Extraembryonic development in insects and the acrobatics of blastokinesis. *Dev Biol* 313: 471–491.
- Tremblay E, Caltagirone L (1973) Fate of polar bodies in insects. *Ann Rev Ent* 18: 421–424.
- Masumoto M, Machida R (2006) Development of embryonic membranes in the silverfish *Lepisma saccharina* Linnaeus (Insecta: Zygentoma, Lepismatidae). *Tissue and Cell* 38: 159–169.

## Author Contributions

Conceived and designed the experiments: AS PT TH PDL. Performed the experiments: AS PDL IF. Analyzed the data: AS PT TH EH JD PC. Contributed reagents/materials/analysis tools: PT JD TH EH PC. Wrote the paper: AS TH PT.

- Thompson S (1999) Nutrition and culture of entomophagous insects. *Ann Rev Entomol* 44: 561–592.
- Anderson D (1973) Embryology and Phylogeny in Annelids and Arthropods. New York: Pergamon Press. pp 1–485.
- Johnston D, Volhard C (1992) The origin of pattern and polarity in the *Drosophila* embryo. *Cell* 68: 201–219.
- Grbic M, Strand M (1998) Shifts in the life history of parasitic wasps correlate with pronounced alterations in early development. *PNAS* 95: 1097–1101.
- Speicher B (1936) Oogenesis, fertilisation and early cleavages in *Habrobracon*. *J Morphol* 59: 401–421.
- Dahlman D, Vinson S (1993) Teratocytes: developmental and biochemical characteristics. In: Beckage N, Thompson N, Federici B, eds. *Parasites and Pathogens of Insects*. San Diego: Parasites Academic Press. pp 145–165.
- Pennacchio F, Vincent S, Tremblay E (1994) Morphology and ultrastructure of the serosal cells (teratocytes) in *Cardiochiles nigriceps* (Hymenoptera: Braconidae) embryos. *Int J Insect Morphol Embryol* 23: 93–104.
- Zhang D, Dahlman D, Jarlfors U, Southgate H, Wiley S (1994) Ultrastructure of *Microplitis croceipes* (Cresson) (Braconidae: Hymenoptera) teratocytes. *Int J Insect Morphol Embryol* 23: 173–187.
- DeBuron I, Beckage N (1997) Developmental changes in teratocytes of the braconid wasp *Cotesia congregata* in larvae of the tobacco hornworm, *Manduca sexta*. *J Insect Physiol* 43: 915–930.
- Suzuki M, Tanaka T (2007) Development of *Meteorus pulchricornis* and regulation of its noctuid host, *Pseudaletia separata*. *J Insect Physiol* 53: 1072–1078.
- Zeh D, Zeh J, Smith R (1989) Ovipositors, amnions and eggshell architecture in the diversification of terrestrial arthropods. *Q Rev Biol* pp 147–168.
- VanDerZee M, Berns N, Roth S (2005) Distinct Functions of the *Tribolium zeroknutt* Genes in Serosa Specification and Dorsal Closure. *Curr Biol* 15: 624–636.
- Machida R, Ando H (1998) Evolutionary changes in developmental potentials of the embryo proper and embryonic membranes along with the derivative structures in Atelocerata, with special reference to Hexapoda (Arthropoda). *Proc Arthropod Embryol Jpn* 33: 1–13.
- Handel K, Grünfelder C, Roth S, Sander K (2000) *Tribolium* embryogenesis: a SEM study of cell shapes and movements from blastoderm to serosal closure *Dev Genes Evol* 210: 167–179.
- Panfilio K, Liu P, Akam M, Kaufman T (2006) *Oncopeltus fasciatus* zen is essential for serosal tissue function in kataropsis. *Dev Biol* 292: 226–243.
- Rafiqi AM, Lemke S, Ferguson S, Stauber M, Schmidt-Ott U (2008) Evolutionary origin of the amnioserosa in cyclorrhaphan flies correlates with spatial and temporal expression changes of zen. *PNAS* 105: 234–239.
- Beckage N, Buron Id (1994) Extraembryonic membranes of the endoparasitic wasp *Cotesia congregata*: presence of a separate amnion and serosa. *J Parasitol* 80: 389–396.
- Grimaldi A, Caccia S, Congiu T, Ferrarese R, Tettamanti G, et al. (2006) Structure and function of the extraembryonic membrane persisting around the larvae of the parasitoid *Toxoneuron nigriceps*. *J Insect Physiol* 52: 870–880.
- Pedata P, Garonna A, Zabatta A, Zeppa P, Romani R, et al. (2003) Development and morphology of teratocytes in *Encarsia berlesii* and *Encarsia citrina*: first record for Chalcidoidea. *J Insect Physiol* 49: 1063–1071.
- Ferkovich S, Dillard C (1986) A study of uptake of radiolabeled host proteins and protein synthesis during development of eggs of the endoparasitoid, *Microplitis croceipes* (Cresson) (Braconidae). *Insect Biochemistry* 16: 337–345.
- Strand M, Casas J (2008) Parasitoid and host nutritional physiology in behavioral ecology. In: Wajnberg E, Berstein C, Alphen Jv, eds. *Behavioral Ecology of Insect Parasitoids*. Oxford: Blackwell. pp 113–128.
- Tilden R, Ferkovich S (1987) Regulation of protein synthesis during egg development of the parasitic wasp, *Microplitis croceipes* (Cresson) (Braconidae). *Insect Biochem* 17: 783–792.
- Danen E, Yamada K (2001) Fibronectin, integrins and growth control. *J Cell Physiol* 189: 1–13.
- Fedoroff S, Richardson A, eds (2001) *Protocols for neural cell culture*. 3 ed. Totowa, Nj: Humana Press.
- Freshney R, ed (2005) *Culture of cell animal: a manual of basic technic*. 5 ed. Hoboken: John Wiley & Sons.
- Digilio M, Pennacchio F, Tremblay E (1998) Host regulation effects of ovary fluid and venom of *Aphidius ervi* (Hymenoptera: Braconidae). *J Insect Physiol* 44: 779–784.
